# Supplementary material
Source: MDPI journal article supplement (https://www.mdpi.com/2673-7167/4/1/6)
Supplement: s1 [file s1]

# Effect of Molecular Architecture of Surface-Active Organosilicon Macromers on Their Colloidal Properties in Relation to Heterophasic Radical Polymerization of Styrene and Methyl Methacrylate

Synthesis of  $\alpha, \omega$  - dipropylmethacrylatepolydimethylsiloxane with the number of repeating siloxane units  $n = 20$  (I-SAM)

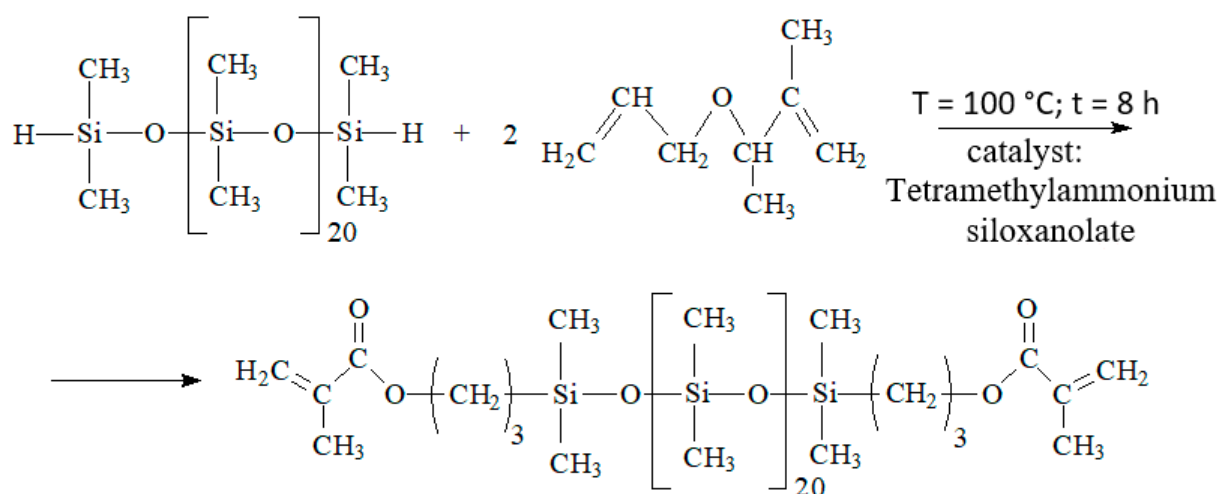

1 g of polydimethylsiloxane hydride ( $n = 20$ ) was dissolved in 0.96 g of anhydrous toluene, 0.164 g (5% excess based on GPDMS) of allyl methacrylate and 1.5  $\mu\text{l}$  of Karstedt's catalyst were added. The reaction was carried out at  $T = 60^\circ\text{C}$  for 12 hours, with vigorous stirring. Then low-boiling components were distilled off at a temperature of  $140^\circ\text{C}$ . The structure of the obtained compound was confirmed by the data of  $^1\text{H}$  NMR spectroscopy (Figure 1).

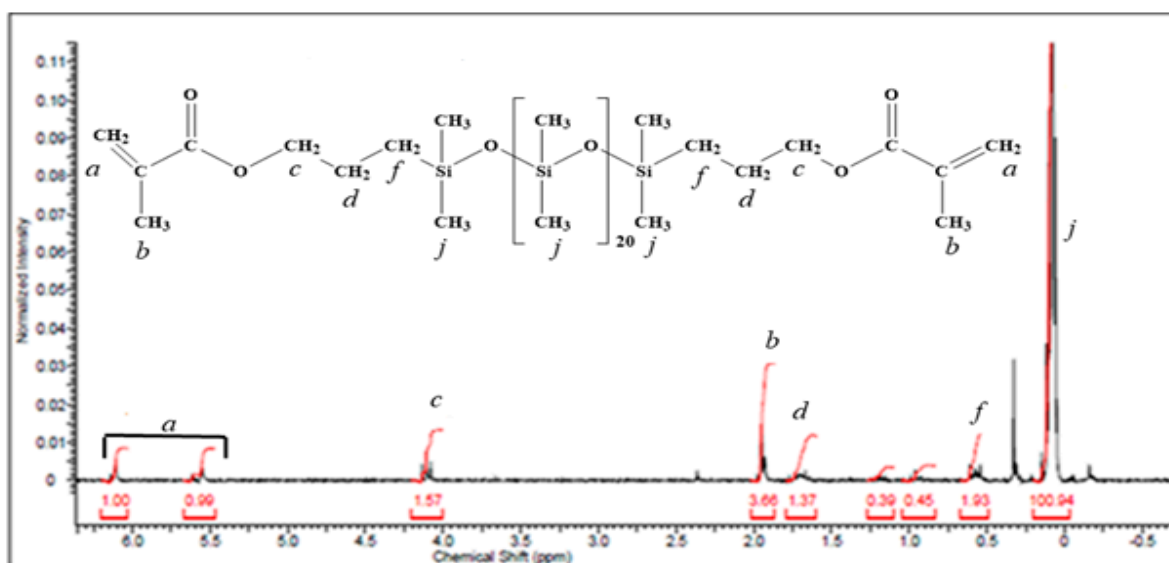

Figure S1.  $^1\text{H}$  NMR spectrum of  $\alpha, \omega$  - dipropyl methacrylate polydimethylsiloxane ( $n = 20$ ).

On the spectrum, the letters from a to j show which peak corresponds to which functional group.

**Synthesis of branched  $\gamma$  -methacryloxypropyl containing dimethylsiloxane oligomer (b-SAM)**

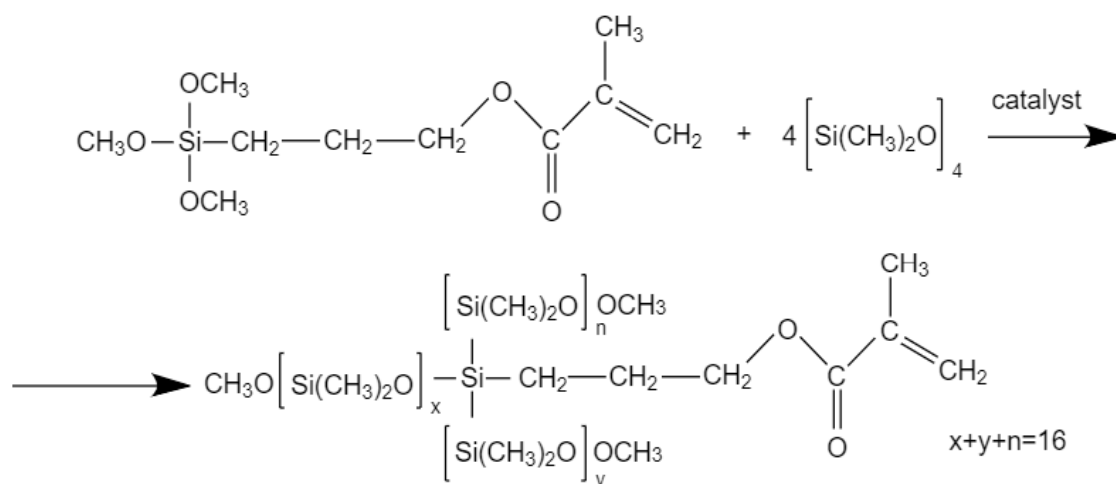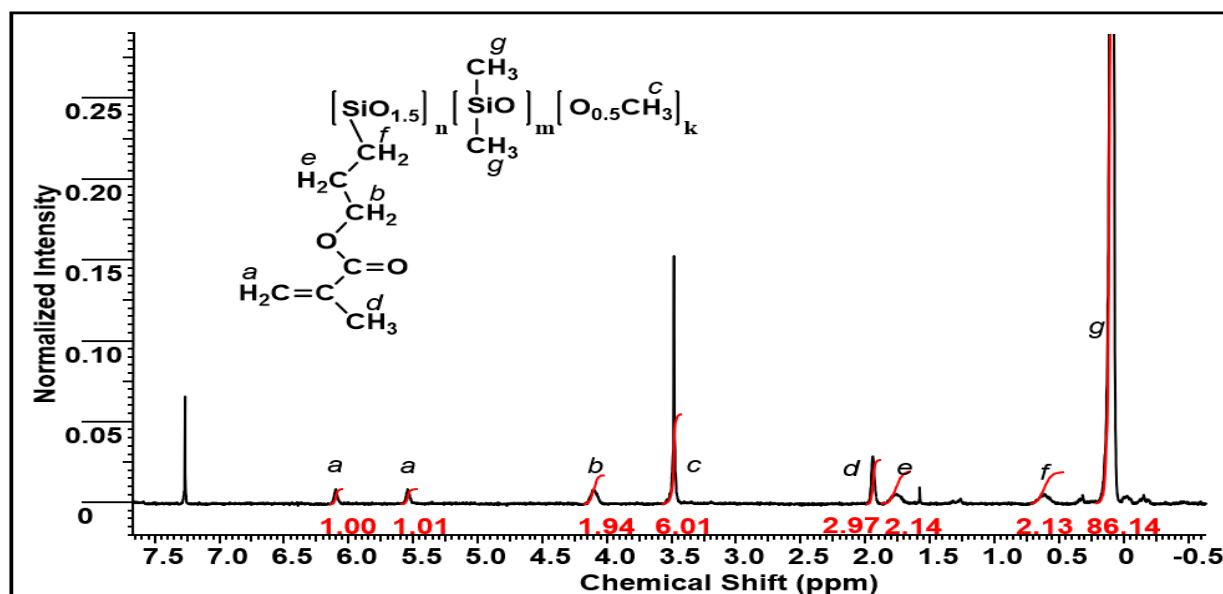

**Figure S2.**  $^1\text{H}$  NMR spectrum of branched  $\gamma$  -methacryloxypropyl containing dimethylsiloxane oligomer. On the spectrum, the letters from a to g show which peak corresponds to which functional group.

**Synthesis of oligo-( $\gamma$ -methacryloxypropyl)silsesquioxane (s-SAM)**

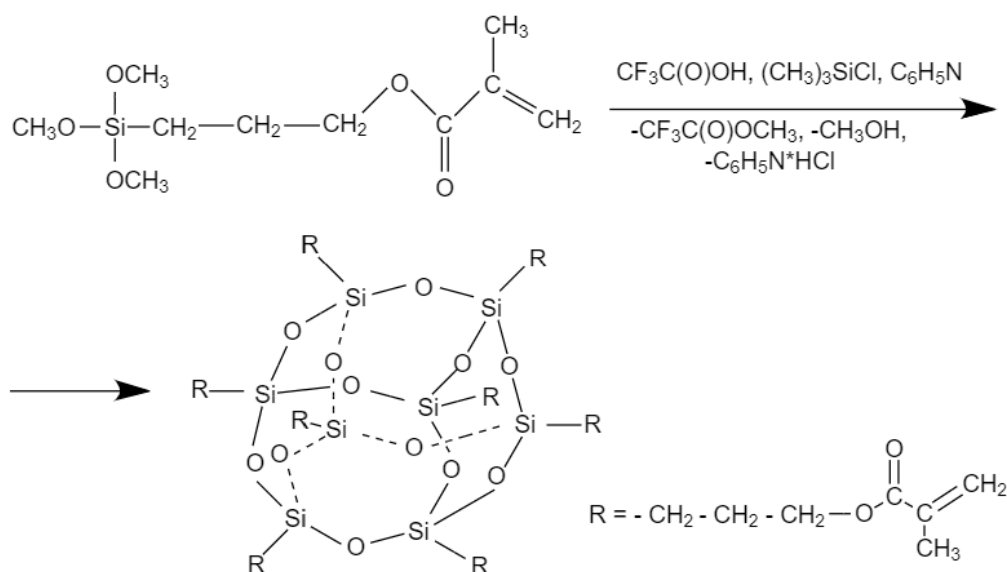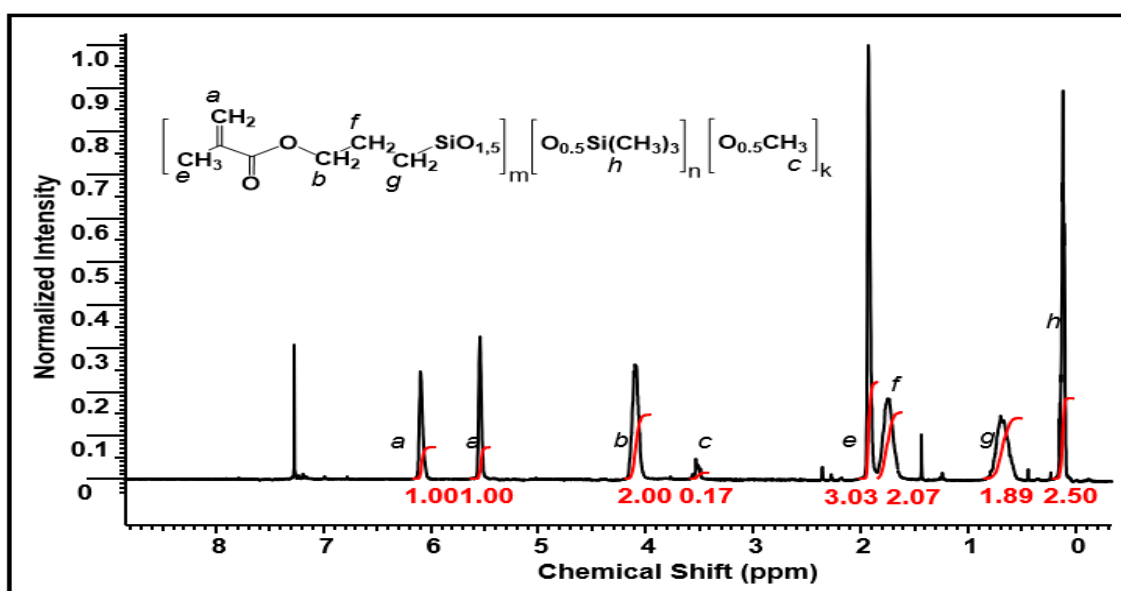

**Figure S3.**  $^1\text{H}$  NMR spectrum of oligo-( $\gamma$ -methacryloxypropyl)silsesquioxane. On the spectrum, the letters from a to h show which peak corresponds to which functional group.

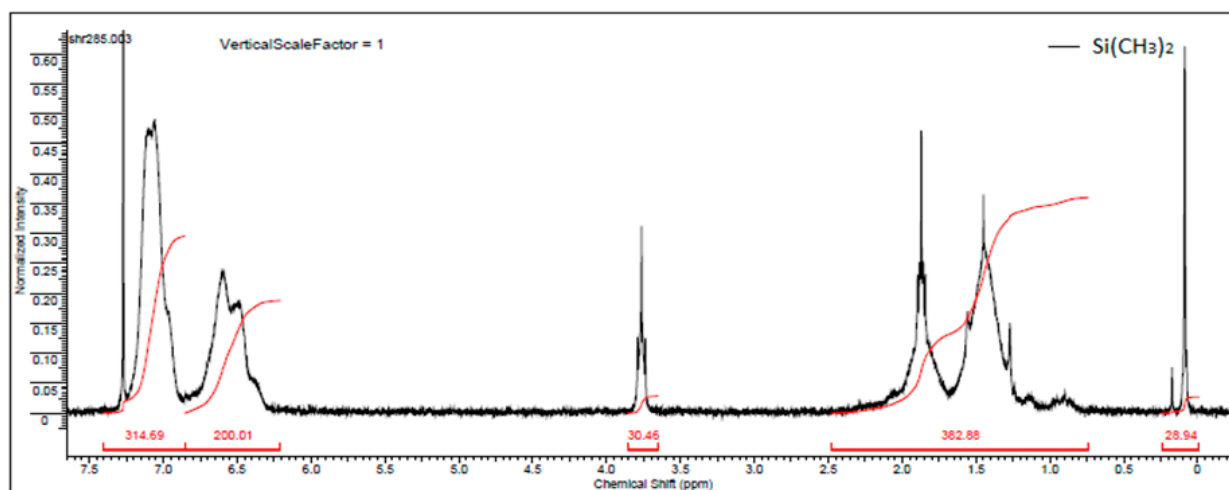

**Figure S4.**  $^1\text{H}$  NMR spectrum of high molecular weight fraction of the styrene polymerization product in the presence of SAM.

| Size<br>d.nm | Mean<br>Number % | Std Dev<br>Number % | Size<br>d.nm | Mean<br>Number % | Std Dev<br>Number % | Size<br>d.nm | Mean<br>Number % | Std Dev<br>Number % | Size<br>d.nm | Mean<br>Number % | Std Dev<br>Number % |
|--------------|------------------|---------------------|--------------|------------------|---------------------|--------------|------------------|---------------------|--------------|------------------|---------------------|
| 0,4000       | 0,0              |                     | 5,615        | 0,0              |                     | 78,82        | 0,0              |                     | 1106         | 0,0              |                     |
| 0,4632       | 0,0              |                     | 6,503        | 0,0              |                     | 91,28        | 0,0              |                     | 1281         | 22,0             |                     |
| 0,5365       | 0,0              |                     | 7,531        | 0,0              |                     | 105,7        | 0,0              |                     | 1484         | 47,0             |                     |
| 0,6213       | 0,0              |                     | 8,721        | 0,0              |                     | 122,4        | 0,0              |                     | 1718         | 28,0             |                     |
| 0,7195       | 0,0              |                     | 10,10        | 0,0              |                     | 141,8        | 0,0              |                     | 1990         | 3,0              |                     |
| 0,8332       | 0,0              |                     | 11,70        | 0,0              |                     | 164,2        | 0,0              |                     | 2305         | 0,0              |                     |
| 0,9649       | 0,0              |                     | 13,54        | 0,0              |                     | 190,1        | 0,0              |                     | 2669         | 0,0              |                     |
| 1,117        | 0,0              |                     | 15,69        | 0,0              |                     | 220,2        | 0,0              |                     | 3091         | 0,0              |                     |
| 1,294        | 0,0              |                     | 18,17        | 0,0              |                     | 255,0        | 0,0              |                     | 3580         | 0,0              |                     |
| 1,499        | 0,0              |                     | 21,04        | 0,0              |                     | 295,3        | 0,0              |                     | 4145         | 0,0              |                     |
| 1,736        | 0,0              |                     | 24,36        | 0,0              |                     | 342,0        | 0,0              |                     | 4801         | 0,0              |                     |
| 2,010        | 0,0              |                     | 28,21        | 0,0              |                     | 396,1        | 0,0              |                     | 5560         | 0,0              |                     |
| 2,328        | 0,0              |                     | 32,67        | 0,0              |                     | 458,7        | 0,0              |                     | 6439         | 0,0              |                     |
| 2,696        | 0,0              |                     | 37,84        | 0,0              |                     | 531,2        | 0,0              |                     | 7456         | 0,0              |                     |
| 3,122        | 0,0              |                     | 43,82        | 0,0              |                     | 615,1        | 0,0              |                     | 8635         | 0,0              |                     |
| 3,615        | 0,0              |                     | 50,75        | 0,0              |                     | 712,4        | 0,0              |                     | 1,000e4      | 0,0              |                     |
| 4,187        | 0,0              |                     | 58,77        | 0,0              |                     | 825,0        | 0,0              |                     |              |                  |                     |
| 4,849        | 0,0              |                     | 68,06        | 0,0              |                     | 955,4        | 0,0              |                     |              |                  |                     |

**Table S1.** The numerical data of the distribution of the diameters of the polystyrene particles obtained in the presence of I-SAM.
